# Supplementary material for: PLATELET FACTOR 4 (PF4) IMPROVES SURVIVAL IN A MURINE MODEL OF ANTIBIOTIC-SUSCEPTIBLE AND METHICILLIN-RESISTANT STAPHYLOCOCCUS AUREUS PERITONITIS
Source: PubMed Central journal article supplement — bioRxiv. 2023 Aug 26:2023.08.25.554865. Preprint. [Version 1] doi: 10.1101/2023.08.25.554865 (PMC10473751; doi:10.1101/2023.08.25.554865), 2023-08-26
Supplement: media-1.pdf [file media-1.pdf]

## SUPPLEMENTARY MATERIAL

### PLATELET FACTOR 4 (PF4) IMPROVES SURVIVAL IN A MURINE MODEL OF ANTIBIOTIC-SUSCEPTIBLE AND METHICILLIN-RESISTANT STAPHYLOCOCCUS AUREUS PERITONITIS

Nataly P. Podolnikova, Valeryi K. Lishko, Robert Roberson, Zhiqian Koh, Dmitry Derkach, David Richardson, Michael Sheller and Tatiana P. Ugarova

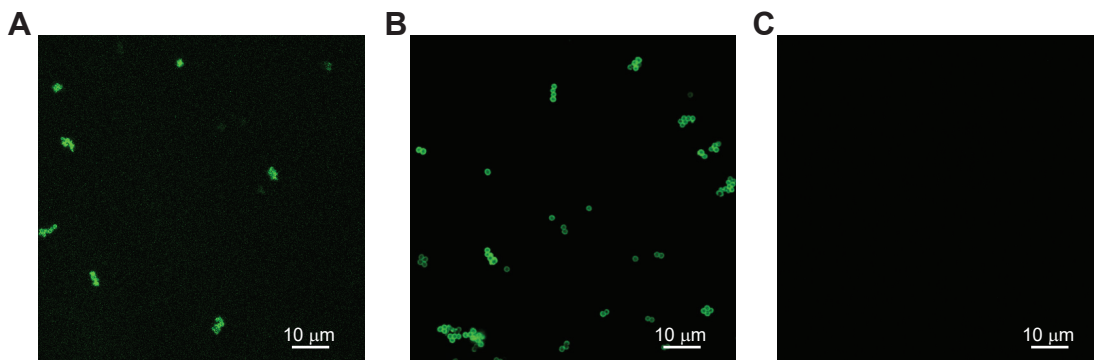

**Supplemental Figure 1. Confocal images showing specific binding of anti-PF4 antibody to rPF4- bound *S. aureus*.** Nonencapsulated (A) and encapsulated (B) *S. aureus* was incubated with rPF4. After washing, bacteria were incubated with rabbit polyclonal anti-PF4 antibody (1:250) for 30 min at 22 °C, followed by Alexa Fluor 488-conjugated secondary antibody, fixed and observed using confocal system. (C) Control experiment showing the lack of the secondary antibody binding to the rPF4-treated noncapsulated bacteria in the absence of the primary antibody. The scale bars are 10 µm.

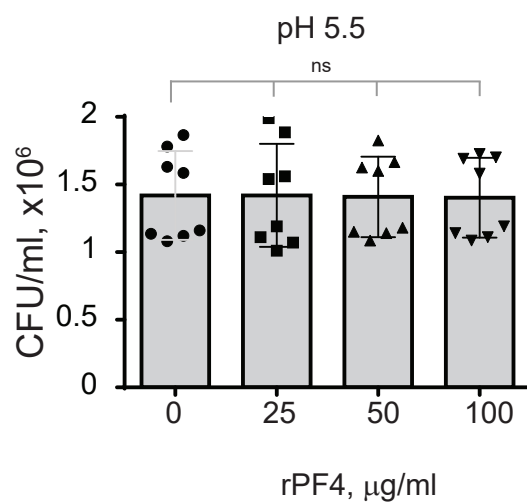

**Supplemental Figure 2. Effect of rPF4 on bacterial growth.** For the solution-phase microbicidal assays, *S. aureus* at 10<sup>6</sup> CFU/ml were inoculated into MES buffer (pH 5.5) and incubated with different concentrations of rPF4 for 1 h at 37°C. Aliquots (100 μl) of diluted suspensions (1:500) were cultured on LB agar plates. Colonies were enumerated after incubation for 24 h at 37 °C. Data are expressed as CFU/ml and are means ± S.D. from three individual experiments. ns, no significant difference.

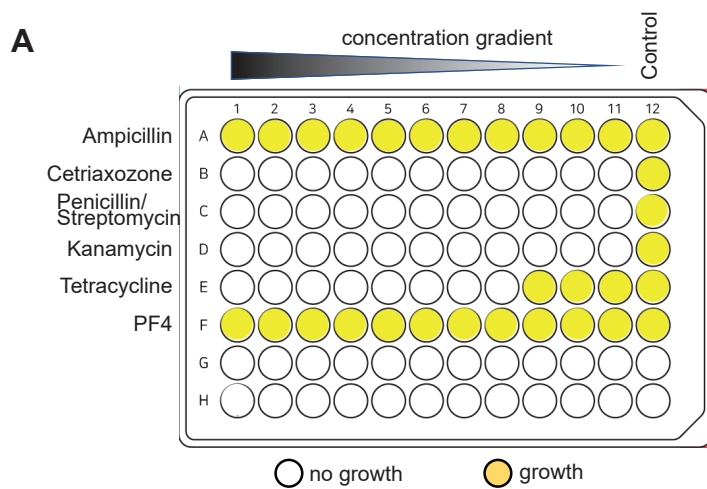

**B**

| Antibiotic or PF4       | Range of antibiotics, $\mu\text{g/ml}$ | MIC, $\mu\text{g/ml}$ |
|-------------------------|----------------------------------------|-----------------------|
| Ampicillin              | 5-5000                                 | >5000                 |
| Ceftriaxone             | 0.02-20                                | < 0.02                |
| Penicillin/Streptomycin | 2-2500                                 | < 2                   |
| Kanamycin               | 5-5000                                 | < 5                   |
| Tetracycline            | 6-6000                                 | 23                    |
| PF4                     | 0.5-500                                | >500                  |

**Supplemental Figure 3. Minimal Inhibitory concentration (MIC) of rPF4. (A)** Aliquots of *S. aureus* ( $10^3$  CFU) in LB were added to the wells containing serial dilutions (1:2) of rPF4 (0.4-500  $\mu\text{g/ml}$ ) and selected antibiotics. The visible growth of bacteria was evaluated after overnight incubation. Control, wells with no added inhibitors. **(B)** The concentrations of antibiotics or PF4 used in the MIC assay.

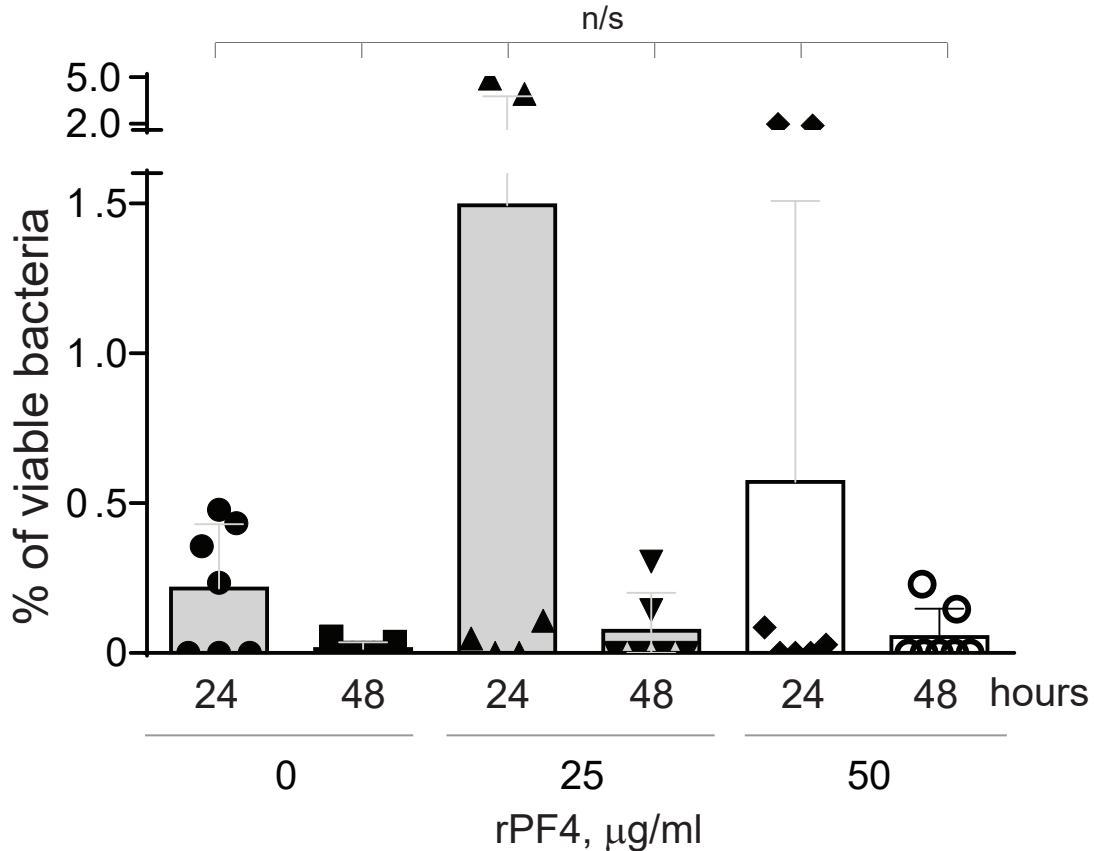

**Supplemental Figure 4. Effect of rPF4 on intracellular bacterial killing.** Adherent IC-21 macrophages ( $5 \times 10^5$ ) were incubated with  $10^6$  CFU of *S. aureus* without or with two concentrations of rPF4 (25 and 50  $\mu\text{g/ml}$ ) for 1 h at 37 °C. Cells were washed, and extracellular bacteria were inactivated by treatment with gentamicin for 1 h, after which macrophages were cultured in DMEM for 24 and 48 hours and then lysed. Aliquots of cell lysates were plated on LB agar plates for 16 h at 37 °C, and CFUs determined. The number of viable bacteria was expressed as a percent of viable bacteria present in macrophages 1 h after gentamicin treatment. Data are means  $\pm$  S.D. from six experiments.
